# Supplementary material
Source: PubMed Central journal article supplement (PMC3039371)
Supplement: supp_M110.200774_jbc.M110.200774-1.pdf [file supp_M110.200774_jbc.M110.200774-1.pdf]

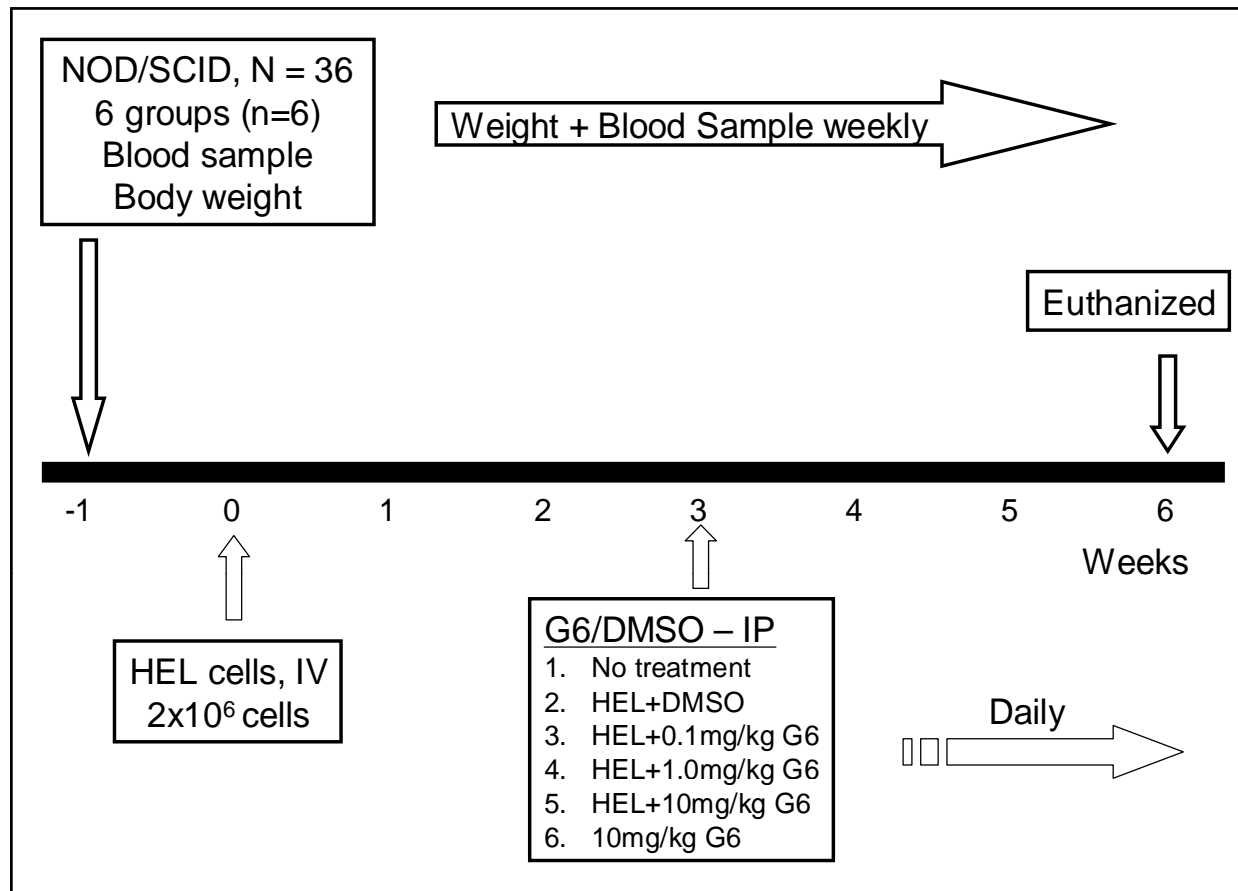

**Model of Jak2-V617F mediated hyperplasia:** Four of the six groups (2, 3, 4, and 5) received  $2 \times 10^6$  HEL cells via a single tail vein injection at Day 0. The disease was allowed to progress for 3 weeks at which time the mice began receiving daily injections of either vehicle control (DMSO) or G6 at the dosages of 0.1, 1, and 10 mg/kg/day for the next 21 days. 24 hours after the last injection, the mice were euthanized and prepared for analysis.
